# Supplementary material for: Translation and Factorial Validation of the Self-Compassion Scale for Adolescents in a German Community Sample
Source: Springer Nature journal article supplement (doi:10.1007/s10826-023-02569-1), 2023-04-07
Supplement: MOESM1 [file 25220804]

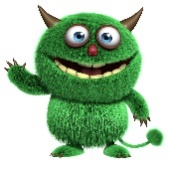
**SCS Jugend**

Patientenchiffre: _ _ _ _ _ _ Datum: ___________ T:_ _

Schätze bitte jede der folgenden Aussagen mit Hilfe der bereitgestellten Skala ein. Wähle dabei die Ziffer, die in den letzten Tagen am ehesten auf Dich zutrifft.

x

1 2 3 4 5

sehr selten selten gelegentlich oft sehr oft

|  | **1**  **sehr selten** | **2**  **selten** | **3**  **gelegent- lich** | **4**  **oft** | **5**  **sehr oft** |
| --- | --- | --- | --- | --- | --- |
| 1. Ich bin hart zu mir selbst, wenn ich mich nicht   gut genug fühle. | **□** | **□** | **□** | **□** | **□** |
| 2. Wenn ich traurig, wütend, einsam oder besorgt bin, neige ich dazu, nur noch darauf zu achten, was falsch läuft und mache mir darüber Sorgen. | **□** | **□** | **□** | **□** | **□** |
| 3. Wenn es für mich gerade nicht gut läuft, denke ich daran, dass Schwierigkeiten zum Leben dazugehören und jeder so etwas einmal durchmacht. | **□** | **□** | **□** | **□** | **□** |
| 4. Wenn ich über Dinge nachdenke, die ich nicht gut hinkriege, fühle ich mich von allen anderen Personen dieser Welt abgeschnitten. | **□** | **□** | **□** | **□** | **□** |
| 5. Ich versuche, freundlich zu mir selbst zu sein, wenn ich traurig, wütend, allein oder einsam bin. | **□** | **□** | **□** | **□** | **□** |
| 6. Wenn mir etwas, was mir sehr wichtig ist, nicht gelingt, fühle ich mich vollkommen dumm. | **□** | **□** | **□** | **□** | **□** |
| 7. Wenn ich traurig, wütend, einsam oder besorgt bin, denke ich daran, dass es vielen anderen auch so geht. | **□** | **□** | **□** | **□** | **□** |
| 8. Wenn ich schwierige Zeiten durchlebe, bin ich sehr streng mit mir. | **□** | **□** | **□** | **□** | **□** |
| 9. Wenn mich etwas aufregt, versuche ich, meine Gefühle wahrzunehmen und mich nicht von ihnen mitreißen zu lassen. | **□** | **□** | **□** | **□** | **□** |
| 10. Wenn ich mich in etwas nicht gut genug fühle, versuche ich daran zu denken, dass andere Leute sich auch manchmal so fühlen. | **□** | **□** | **□** | **□** | **□** |
| 11. Ich bin unfreundlich und ungeduldig gegenüber Eigenschaften, die ich an mir nicht mag. | **□** | **□** | **□** | **□** | **□** |

|  | **1**  **sehr**  **selten** | **2**  **selten** | **3**  **gelegent- lich** | **4**  **oft** | **5**  **sehr oft** |
| --- | --- | --- | --- | --- | --- |
| 12. Wenn es mir schlecht geht, lasse ich mir selbst die Fürsorge und die Zuneigung zukommen, die ich brauche. | **□** | **□** | **□** | **□** | **□** |
| 13. Wenn ich traurig, wütend, einsam oder besorgt bin, habe ich das Gefühl, dass alle anderen normalerweise glücklicher sind als ich. | **□** | **□** | **□** | **□** | **□** |
| 14. Wenn etwas sehr Beunruhigendes passiert, versuche ich, die Dinge so zu betrachten wie sie sind. | **□** | **□** | **□** | **□** | **□** |
| 15. Ich versuche meine Misserfolge als Teil des Lebens zu sehen. | **□** | **□** | **□** | **□** | **□** |
| 16. Wenn ich Dinge an mir wahrnehme, die ich nicht mag, entmutigt mich das. | **□** | **□** | **□** | **□** | **□** |
| 17. Wenn mir etwas nicht gelingt, was mir wichtig ist, versuche ich, daraus keine große Sache zu machen. | **□** | **□** | **□** | **□** | **□** |
| 18. Wenn ich mich mit etwas richtig abmühe, habe ich das Gefühl, dass es anderen normalerweise einfacherer von der Hand geht. | **□** | **□** | **□** | **□** | **□** |
| 19. Ich bin zu mir selbst freundlich, wenn Dinge schieflaufen und ich mich schlecht fühle. | **□** | **□** | **□** | **□** | **□** |
| 20. Wenn mich etwas aufregt, werde ich von meinen Gefühlen mitgerissen. | **□** | **□** | **□** | **□** | **□** |
| 21. Ich kann zu mir selbst gemein sein, wenn ich mich schlecht fühle oder mich etwas aufregt. | **□** | **□** | **□** | **□** | **□** |
| 22. Wenn ich traurig, wütend, einsam oder besorgt bin, versuche ich, meinen Gefühlen neugierig zu begegnen und sie nicht zu ignorieren. | **□** | **□** | **□** | **□** | **□** |
| 23. Ich sage mir selbst, dass ich so in Ordnung bin, wie ich bin, auch wenn mir ein Fehler passiert ist oder ich etwas nicht gut gemacht habe. | **□** | **□** | **□** | **□** | **□** |
| 24. Wenn etwas Unangenehmes passiert, mache ich daraus eine große Sache. | **□** | **□** | **□** | **□** | **□** |
| 25. Wenn ich in etwas versage, was für mich wichtig ist, glaube ich, dass nur ich allein versage. | **□** | **□** | **□** | **□** | **□** |
| 26. Ich versuche gegenüber Eigenschaften, die ich an mir nicht mag, verständnisvoll und geduldig zu sein. | **□** | **□** | **□** | **□** | **□** |
